# Supplementary material for: Rapid proteomic responses to a near-lethal heat stress in the salt marsh musselGeukensia demissa
Source: Oxford University Press journal article supplement (doi:10.1242/jeb.141176), 2016-01-01
Supplement: jeb141176supp.pdf [file jeb141176supp.pdf]

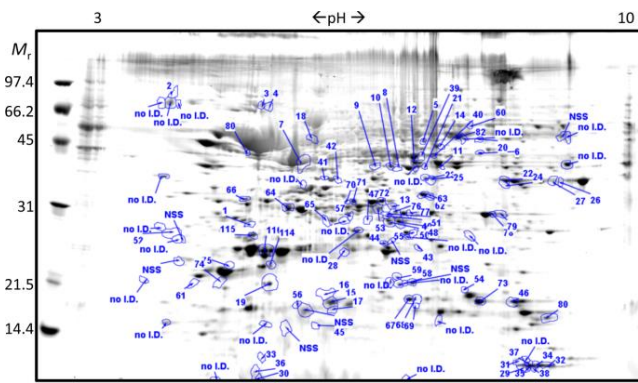

Control

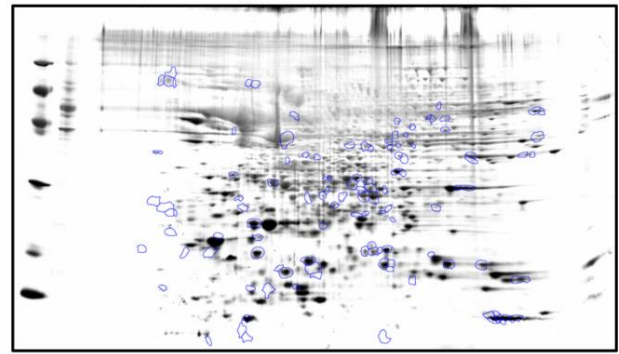

0 hour

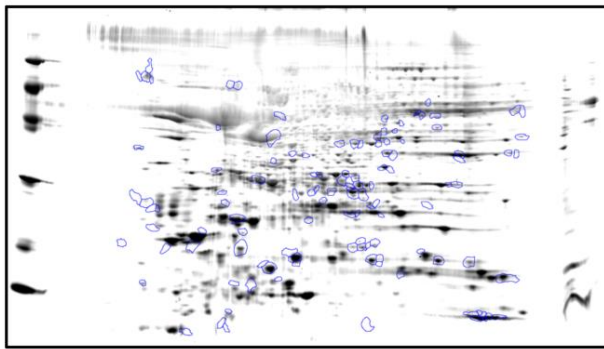

3 hour

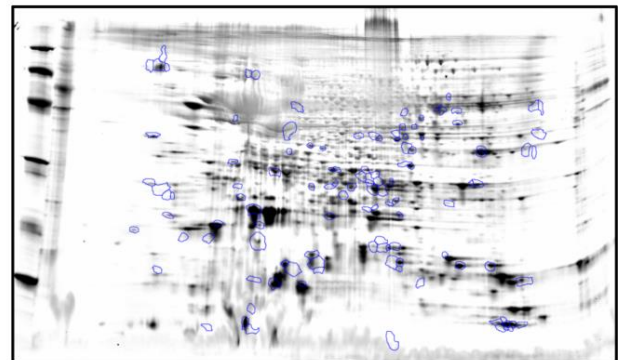

6 hour

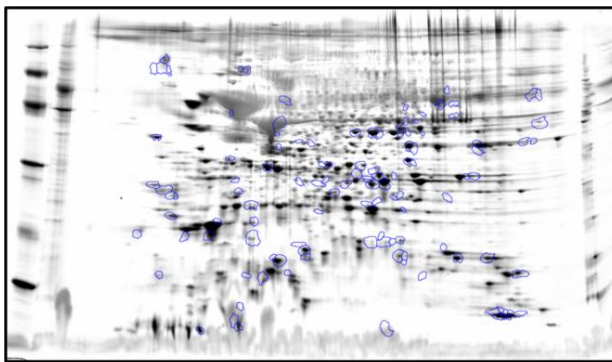

12 hour

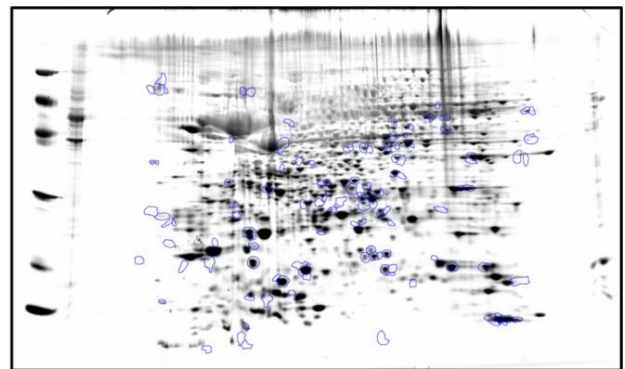

18 hour

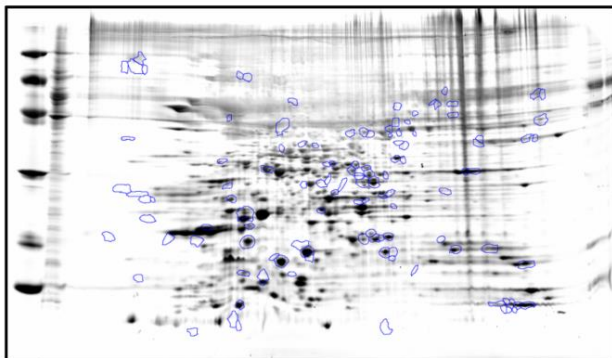

24 hour

**Fig. S1. Representative two dimensional SDSg PAGE gel images from each of the seven treatment groups: Control, 0 hour, 3 hour, 6 hour, 12 hour, 18 hour and 24 hour.** Proteins are separated by isoelectric point (pI) (pH range 3 – ) along the horizontal dimension and by relative molecular mass ( $M_r$ ) along the vertical dimension. Biorad low range molecular weight standards were used for the ladder. The 115 spots selected for identification are outlined on each gel, and are labeled by spot number on the Control gel. See Table S1 for further information on protein identities.

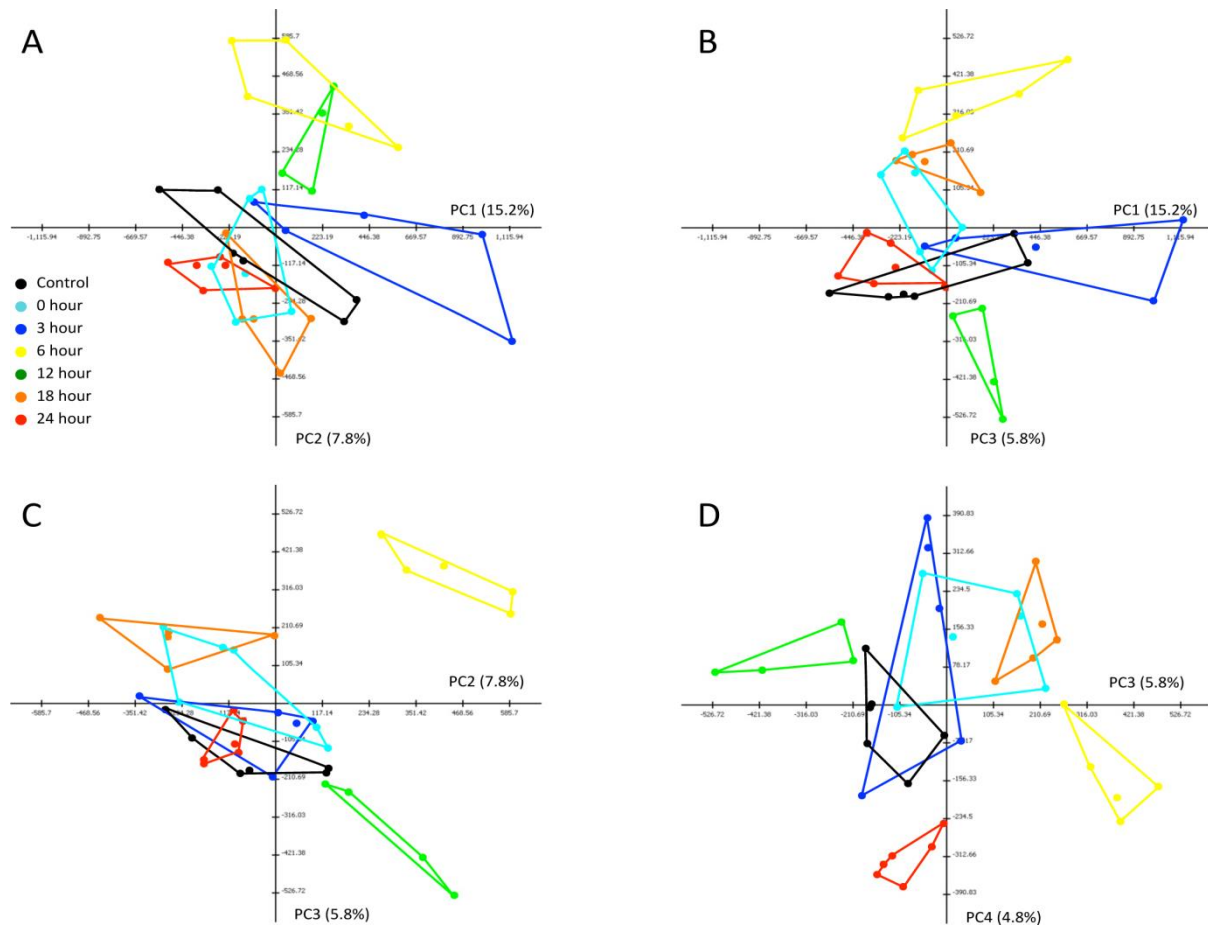

**Fig. S2. Principal components analysis of 933 spots detected on twog dimensional gels using Delta2D software.** Symbols represent individual mussels from the seven groups (black — ntrol; cyan — h; blue — h; yellow — h; green — h; orange — h; red — h).

- A) PC1 vs. PC2. The first PC (horizontal axis) explains the greatest amount of variance among samples 15.2 , but does not clearly separate treatment groups. We interpret this to mean that when analyzing all 933 spots on the 2D gels, most variation in PEPs among mussels is associated with inter---individual differences not associated with recovery time. The second PC (vertical axis) explains 7.8% of variance and separates the 6 h and 12 h treatments from the other groups.
- B) PC1 vs. PC3. The third PC explains 5.8% of total variance, and separates the 6 h group (positive oadings) from the 12 h group;
- C) PC2 vs. PC3. The 6 h and 12 h groups are strongly separated from the other treatments. Compare with Fig. 2A, where the 6 and 12 h treatment groups show a similar separation when the analysis is limited to the 115 spots detected as differing significantly among groups by ANOVA.
- D) PC3 vs. PC4. The fourth PC explains 4.8% of total variance, and separates the 24 h group from other treatments.

Table S1. Proteins from *Geukensia demissa* gill isolated by 2D gel electrophoresis and identified by tandem mass spectrometry. Gray shading indicates protein spots that were contiguous on the 2D gels and had identical IDs, including Genbank accession numbers, and so were combined (i.e., the Delta2D software differentiated multiple spots when there was only one). Proteins with identical names and Genbank accession numbers that are listed in separate rows exist as discrete and non-contiguous spots on the 2D gels (see Fig. S1). Red text indicates protein spots that decreased in abundance significantly at the indicated time point relative to control (all others increased in abundance). If a protein was significantly different from control at multiple time points, it is listed under the first time point at which significance was reached.

| Spot # <sup>a</sup>                                                                                                                        | Protein identification                             | Mowse score <sup>b</sup> | # of peptide matches <sup>c</sup> | Genbank accession. version | Species <sup>d</sup>          | E value <sup>e</sup> | Identity (%) <sup>f</sup> | pI <sup>g</sup> (observed) | Mr (kDa) <sup>g</sup> (observed) |
|--------------------------------------------------------------------------------------------------------------------------------------------|----------------------------------------------------|--------------------------|-----------------------------------|----------------------------|-------------------------------|----------------------|---------------------------|----------------------------|----------------------------------|
| <b>A. Protein spots significantly increased/decreased in abundance relative to control at 0 hours. See Fig. 3 for expression profiles.</b> |                                                    |                          |                                   |                            |                               |                      |                           |                            |                                  |
| 57                                                                                                                                         | Prohibitin                                         | 182                      | 5                                 | XP_012945186.1             | <i>Haliotis diversicolor</i>  | 1E-92                | 81                        | 6.11                       | 30.7                             |
| 78/79                                                                                                                                      | Voltage-dependent ion channel-2 (high pl)          | 77/255                   | 3/8                               | ADI56517.1                 | <i>Haliotis diversicolor</i>  | 2E-156/<br>1E-155    | 75/75                     | 7.9/8.0                    | 31.2/31.2                        |
| 77                                                                                                                                         | Voltage-dependent ion channel-2 (mid pl)           | 147                      | 5                                 | ADI56517.1                 | <i>Haliotis diversicolor</i>  | 1E-155               | 75                        | 6.9                        | 31.4                             |
| 76                                                                                                                                         | Voltage-dependent ion channel-2 (low pl)           | 213                      | 8                                 | ADI56517.1                 | <i>Haliotis diversicolor</i>  | 1E-155               | 75                        | 6.7                        | 31.5                             |
| 25/26                                                                                                                                      | Glyceraldehyde-3-phosphate dehydrogenase (high pl) | 329/<br>152              | 9/4                               | AEF33398.1                 | <i>Crassostrea ariakensis</i> | 2E-86/<br>6E-93      | 50/81                     | 8.7/8.6                    | 40.2/40.3                        |
| 22/27                                                                                                                                      | Glyceraldehyde-3-phosphate dehydrogenase (mid pl)  | 552/<br>483              | 15/14                             | AEF33398.1                 | <i>Crassostrea ariakensis</i> | 0E+00/<br>0E+00      | 82/82                     | 8.0/8.0                    | 39.1/40.9                        |
| 23/24                                                                                                                                      | Glyceraldehyde-3-phosphate dehydrogenase (low pl)  | 64/96                    | 2/3                               | AEF33398.1                 | <i>Crassostrea ariakensis</i> | 4E-148/<br>4E-148    | 72/72                     | 7.0/7.1                    | 40.5/40.6                        |

| Spot # <sup>a</sup>                                                                                                                        | Protein identification                                         | Mowse score <sup>b</sup> | # of peptide matches <sup>c</sup> | Genbank accession. version | Species <sup>d</sup>             | E value <sup>e</sup>         | Identity (%) <sup>f</sup> | pI <sup>g</sup> (observed) | Mr (kDa) <sup>g</sup> (observed) |
|--------------------------------------------------------------------------------------------------------------------------------------------|----------------------------------------------------------------|--------------------------|-----------------------------------|----------------------------|----------------------------------|------------------------------|---------------------------|----------------------------|----------------------------------|
| <b>B. Protein spots significantly increased/decreased in abundance relative to control at 3 hours. See Fig. 4 for expression profiles.</b> |                                                                |                          |                                   |                            |                                  |                              |                           |                            |                                  |
| 3/4                                                                                                                                        | 78 kDa Glucose regulated protein                               | 698/831                  | 19/24                             | BAD15288.1                 | <i>Crassostrea gigas</i>         | 0/0                          | 88/90                     | 4.9/5.0                    | 71.6/72.1                        |
| 64                                                                                                                                         | Small heat shock protein 24.1                                  | 345                      | 8                                 | AEP02968.1                 | <i>Mytilus galloprovincialis</i> | 6E-114                       | 68                        | 5.5                        | 33.0                             |
| 49                                                                                                                                         | Peptidylprolyl cis-trans isomerase (high pl)                   | 418                      | 13                                | EKC29243.1                 | <i>Crassostrea gigas</i>         | 3E-118                       | 90                        | 6.8                        | 28.9                             |
| 47/50/51                                                                                                                                   | Peptidylprolyl cis-trans isomerase (mid pl)                    | 80/259/413               | 3/6/16                            | EKC29243.1                 | <i>Crassostrea gigas</i>         | 3E-118/<br>3E-118/<br>3E-118 | 90/90/90                  | 6.6/6.6/6.6                | 28.7/30.3/30.7                   |
| 48                                                                                                                                         | Peptidylprolyl cis-trans isomerase (low pl)                    | 551                      | 18                                | EKC29243.1                 | <i>Crassostrea gigas</i>         | 3E-118                       | 90                        | 6.3                        | 29.7                             |
| 58/59                                                                                                                                      | Protein deglycase DJ-1                                         | 307                      | 10                                | EKC37254.1                 | <i>Crassostrea gigas</i>         | 5E-70/<br>5E-70              | 67/67                     | 6.8/6.9                    | 17.1/18.4                        |
| 73                                                                                                                                         | Universal stress protein A-like                                | 260                      | 9                                 | XP_011448812.1             | <i>Crassostrea gigas</i>         | 6E-20                        | 82                        | 7.9                        | 14.4                             |
| 43                                                                                                                                         | Nacre protein (high pl)                                        | 171                      | 6                                 | BAK57311.1                 | <i>Pinctada fucata</i>           | 2E-14                        | 31                        | 7.0                        | 23.9                             |
| 44                                                                                                                                         | Nacre protein (low pl)                                         | 101                      | 3                                 | BAK57311.1                 | <i>Pinctada fucata</i>           | 1E-22                        | 31                        | 6.6                        | 24.6                             |
| 82                                                                                                                                         | mitochondrial H <sup>+</sup> ATPase subunit $\alpha$ (high pl) | 612                      | 18                                | EKC39329.1                 | <i>Crassostrea gigas</i>         | 0E+00                        | 88                        | 7.3                        | 55.4                             |
| 5                                                                                                                                          | mitochondrial H <sup>+</sup> ATPase subunit $\alpha$ (low pl)  | 93                       | 2                                 | EKC39329.1                 | <i>Crassostrea gigas</i>         | 2E-164                       | 94                        | 6.9                        | 53.4                             |
| 6                                                                                                                                          | Actin 2 (high pl)                                              | 725                      | 22                                | EKC38058.1                 | <i>Crassostrea gigas</i>         | 0E+00                        | 97                        | 7.6                        | 49.4                             |
| 7                                                                                                                                          | Actin 2 (low pl)                                               | 180                      | 5                                 | EKC38058.1                 | <i>Crassostrea gigas</i>         | 0E+00                        | 99                        | 5.5                        | 45.9                             |
| 18                                                                                                                                         | Actin 2 (low pl, high Mr)                                      | 759                      | 27                                | EKC38058.1                 | <i>Crassostrea gigas</i>         | 0E+00                        | 99                        | 5.5                        | 55.4                             |

| Spot # <sup>a</sup>                                                                                                                        | Protein identification                             | Mowse score <sup>b</sup> | # of peptide matches <sup>c</sup> | Genbank accession. version | Species <sup>d</sup>            | E value <sup>e</sup> | Identity (%) <sup>f</sup> | pI <sup>g</sup> (observed) | Mr (kDa) <sup>g</sup> (observed) |
|--------------------------------------------------------------------------------------------------------------------------------------------|----------------------------------------------------|--------------------------|-----------------------------------|----------------------------|---------------------------------|----------------------|---------------------------|----------------------------|----------------------------------|
| <b>C. Protein spots significantly increased/decreased in abundance relative to control at 6 hours. See Fig. 5 for expression profiles.</b> |                                                    |                          |                                   |                            |                                 |                      |                           |                            |                                  |
| 55                                                                                                                                         | Peroxisredoxin-6                                   | 152                      | 4                                 | ABO26614.1                 | <i>Haliotis discus</i>          | 2E-96                | 72                        | 7.0                        | 26.8                             |
| 45                                                                                                                                         | Nucleoredoxin                                      | 80                       | 1                                 | EKC27452.1                 | <i>Crassostrea gigas</i>        | 2E-40                | 42                        | 5.9                        | 11.6                             |
| 72                                                                                                                                         | Dyp-type peroxidase (high pI)                      | 559                      | 17                                | EKC43063.1                 | <i>Crassostrea gigas</i>        | 1E-109               | 71                        | 6.5                        | 34.4                             |
| 70/71                                                                                                                                      | Dyp-type peroxidase (low pI)                       | 223/797                  | 5/19                              | EKC43063.1                 | <i>Crassostrea gigas</i>        | 1E-109/5E-97         | 71/71                     | 6.0/6.1                    | 34.3/34.4                        |
| 39                                                                                                                                         | NADP+-dependent isocitrate dehydrogenase (high pI) | 244                      | 9                                 | AFI56373.1                 | <i>Mytilus trossulus</i>        | 0E+00                | 92                        | 7.1                        | 48.3                             |
| 40                                                                                                                                         | NADP+-dependent isocitrate dehydrogenase (low pI)  | 364                      | 10                                | AFI56373.1                 | <i>Mytilus trossulus</i>        | 0E+00                | 92                        | 6.9                        | 48.3                             |
| 21                                                                                                                                         | Fructose biphosphate aldolase                      | 281                      | 6                                 | EKC30386.1                 | <i>Crassostrea gigas</i>        | 0E+00                | 85                        | 7.0                        | 44.2                             |
| 65                                                                                                                                         | Triosephosphate isomerase                          | 143                      | 5                                 | AEF33397.1                 | <i>Crassostrea ariakensis</i>   | 3E-86                | 78                        | 5.8                        | 29.7                             |
| 41                                                                                                                                         | Malate dehydrogenase, mitochondrial                | 621                      | 15                                | XP_005096166.1             | <i>Aplysia californica</i>      | 1E-140               | 70                        | 5.7                        | 40.7                             |
| 14                                                                                                                                         | Citrate synthase                                   | 338                      | 10                                | EKC35491.1                 | <i>Crassostrea gigas</i>        | 0E+00                | 77                        | 7.1                        | 52.0                             |
| 12                                                                                                                                         | Arginine kinase (high pI)                          | 437                      | 11                                | AGN95434.1                 | <i>Semisulcospira libertina</i> | 3E-176               | 73                        | 7.2                        | 44.6                             |
| 11                                                                                                                                         | Arginine kinase (low pI)                           | 488                      | 10                                | AGN95434.1                 | <i>Semisulcospira libertina</i> | 2E-179               | 73                        | 6.8                        | 45.7                             |
| 28                                                                                                                                         | Hemicentin-1                                       | 250                      | 9                                 | EKC35524.1                 | <i>Crassostrea gigas</i>        | 2E-20                | 36                        | 6.1                        | 23.5                             |
| 56                                                                                                                                         | Profilin-like                                      | 455                      | 10                                | XP_005111300.1             | <i>Aplysia californica</i>      | 3E-04                | 28                        | 5.6                        | 14.1                             |

|                   |                                                                  |                         |             |            |                                  |                                     |                   |                         |                         |
|-------------------|------------------------------------------------------------------|-------------------------|-------------|------------|----------------------------------|-------------------------------------|-------------------|-------------------------|-------------------------|
| 74/75             | Vitelline membrane outer layer protein 1                         | 147/341                 | 6/11        | EKC25506.1 | <i>Crassostrea gigas</i>         | 2E-51/4E-50                         | 48/48             | 4.7/4.7                 | 17.6/20.4               |
| 114/116           | Putative C1q domain containing protein MgC1q96 (low Mw, high pl) | 445/592                 | 9/18        | CBX41745.1 | <i>Mytilus galloprovincialis</i> | 1E-52/1E-52                         | 52/52             | 5.2/5.3                 | 20.5/23.5               |
| 115               | Putative C1q domain containing protein MgC1q96 (high Mw, low pl) | 310                     | 7           | CBX41745.1 | <i>Mytilus galloprovincialis</i> | 1E-52                               | 52                | 5.0                     | 26.8                    |
| 29/30/32/34/36/37 | Heterogeneous nuclear ribonucleoprotein 27C (high pl)            | 171/158/174/141/117/205 | 5/5/8/7/4/6 | EKC41770.1 | <i>Crassostrea gigas</i>         | 6E-28/6E-28/3E-30/2E-26/1E-28/1E-27 | 67/67/67/59/60/67 | 8.8/8.7/9.0/8.8/8.7/8.7 | 4.4/4.7/4.9/5.0/4.6/5.2 |
| 31/33/35          | Heterogeneous nuclear ribonucleoprotein 27C (low pl)             | 231/221/112             | 6/5/3       | EKC41770.1 | <i>Crassostrea gigas</i>         | 1E-28/8E-28/1E-27                   | 60/67/61          | 5.2/5.3/5.3             | 6.6/4.8/3.6             |
| 42                | N(G), N(G) dimethylarginine dimethylamino-hydrolase 1            | 128                     | 2           | EKC40016.1 | <i>Crassostrea gigas</i>         | 1E-70                               | 71                | 5.9                     | 40.6                    |

| Spot # <sup>a</sup>                                                                                                                                | Protein identification                  | Mowse score <sup>b</sup> | # of peptide matches <sup>c</sup> | Genbank accession. version | Species <sup>d</sup>             | E value <sup>e</sup>      | Identity (%) <sup>f</sup> | pI <sup>g</sup> (observed) | Mr (kDa) <sup>g</sup> (observed) |
|----------------------------------------------------------------------------------------------------------------------------------------------------|-----------------------------------------|--------------------------|-----------------------------------|----------------------------|----------------------------------|---------------------------|---------------------------|----------------------------|----------------------------------|
| <b>D. Protein spots significantly increased/decreased in abundance relative to control at <u>12 hours</u>. See Fig. 6 for expression profiles.</b> |                                         |                          |                                   |                            |                                  |                           |                           |                            |                                  |
| 8/10                                                                                                                                               | Alcohol dehydrogenase type 3 (high pI)  | 413/437                  | 10/13                             | EKC37227.1                 | <i>Crassostrea gigas</i>         | 1E-60/<br>1E-60           | 58/58                     | 6.6/6.7                    | 44.0/44.0                        |
| 9                                                                                                                                                  | Alcohol dehydrogenase type 3 (low pI)   | 263                      | 8                                 | EKC37227.1                 | <i>Crassostrea gigas</i>         | 1E-60                     | 58                        | 6.3                        | 44.3                             |
| 67/68/<br>69                                                                                                                                       | Universal stress protein-like isoform 2 | 178/82/<br>81            | 7/2/2                             | AEF33379.1                 | <i>Crassostrea ariakensis</i>    | 3E-26/<br>3E-26/<br>3E-26 | 37/37/37                  | 7.0/7.1/7.1                | 14.7/14.9/<br>13.5               |
| 52                                                                                                                                                 | Perlucin-like                           | 123                      | 4                                 | P86854.1                   | <i>Mytilus galloprovincialis</i> | 1E-24                     | 34                        | 4.0                        | 27.0                             |
| 61                                                                                                                                                 | Putative perlucin-4                     | 146                      | 4                                 | ABO26593.1                 | <i>Haliotis discus</i>           | 1E-20                     | 38                        | 4.4                        | 17.0                             |



| Spot # <sup>a</sup>                                                                                                                                | Protein identification | Mowse score <sup>b</sup> | # of peptide matches <sup>c</sup> | Genbank accession. version | Species <sup>d</sup>          | E value <sup>e</sup> | Identity (%) <sup>f</sup> | pI <sup>g</sup> (observed) | Mr (kDa) <sup>g</sup> (observed) |
|----------------------------------------------------------------------------------------------------------------------------------------------------|------------------------|--------------------------|-----------------------------------|----------------------------|-------------------------------|----------------------|---------------------------|----------------------------|----------------------------------|
| <b>E. Protein spots significantly increased/decreased in abundance relative to control at <u>18 hours</u>. See Fig. 7 for expression profiles.</b> |                        |                          |                                   |                            |                               |                      |                           |                            |                                  |
| 13                                                                                                                                                 | Cathepsin B            | 67                       | 2                                 | AEJ08755.1                 | <i>Crassostrea ariakensis</i> | 3E-162               | 70                        | 6.6                        | 32.8                             |
| 20                                                                                                                                                 | Flotillin-2            | 74                       | 3                                 | EKC35912.1                 | <i>Crassostrea gigas</i>      | 3E-158               | 70                        | 7.6                        | 55.2                             |

| Spot # <sup>a</sup>                                                                                                                         | Protein identification                             | Mowse score <sup>b</sup> | # of peptide matches <sup>c</sup> | Genbank accession. version | Species <sup>d</sup>       | E value <sup>e</sup> | Identity (%) <sup>f</sup> | pI <sup>g</sup> (observed) | Mr (kDa) <sup>g</sup> (observed) |
|---------------------------------------------------------------------------------------------------------------------------------------------|----------------------------------------------------|--------------------------|-----------------------------------|----------------------------|----------------------------|----------------------|---------------------------|----------------------------|----------------------------------|
| <b>F. Protein spots significantly increased/decreased in abundance relative to control at 24 hours. See Fig. 8 for expression profiles.</b> |                                                    |                          |                                   |                            |                            |                      |                           |                            |                                  |
| 19                                                                                                                                          | Eukaryotic translation initiation factor 5A-1-like | 248                      | 6                                 | XP_005094246.1             | <i>Aplysia californica</i> | 4E-67                | 68                        | 5.3                        | 17.1                             |
| 2                                                                                                                                           | 5'-AMP-activated protein kinase subunit $\beta$ -2 | 67                       | 2                                 | EKC38929.1                 | <i>Crassostrea gigas</i>   | 2E-21                | 56                        | 3.7                        | 79.8                             |
| 46                                                                                                                                          | Nucleoside diphosphate kinase                      | 254                      | 9                                 | AFK73702.1                 | <i>Ostrea edulis</i>       | 1E-64                | 84                        | 8.3                        | 14.1                             |
| 1                                                                                                                                           | 15-hydroxyprostaglandin dehydrogenase              | 59                       | 2                                 | EKC19471.1                 | <i>Crassostrea gigas</i>   | 1E-55                | 55                        | 4.9                        | 29.2                             |
| 54                                                                                                                                          | Peroxisome oxidin-5, mitochondrial                 | 167                      | 5                                 | EKC39509.1                 | <i>Crassostrea gigas</i>   | 1E-77                | 77                        | 7.7                        | 16.5                             |

<sup>a</sup>Spot numbers correspond to spot labels on the gel images in Figure S1.

<sup>b</sup>Molecular Weight Search score returned by Mascot. Scores above 45 indicate homology between the MS/MS peptides and the *G. demissa* EST entry ( $P < 0.05$ ).

<sup>c</sup>Number of non-overlapping peptides detected by MS/MS found in the *G. demissa* EST entry. If one spot matched more than one EST entry, and all EST entries matched the same Genbank sequence, this is the sum of peptides.

<sup>d</sup>Species from which the most significant BLAST protein match was derived. BLAST searches were limited to molluscan nucleotide sequences.

<sup>e</sup>E-value indicates the likelihood that the *G. demissa* EST entry matches the specified Genbank sequence by chance.

<sup>f</sup>The percent amino acid identity between the *G. demissa* EST entry and the specified Genbank sequence.

<sup>g</sup>pI and Mr values were estimated by Mascot software based on location on the 2D gels.
